# Supplementary material for: "What else are you worried about?" – Integrating textual responses into quantitative social science research
Source: PLoS One. 2017 Jul 31;12(7):e0182156. doi: 10.1371/journal.pone.0182156 (PMC5536367; doi:10.1371/journal.pone.0182156)
Supplement: S3 List — (CSV) [file pone.0182156.s003.csv]

abbau	reduction
abgab	fee
abitur	Abitur
abnehm	decreasing
abschluss	graduation
absteigt	descends
abstieg	degression
abwanderung	emigration
abzocke	rip-off
abzüge	deductions
achtung	attention
afganistan	Afganistan
afghanistan	Afghanistan
afrika	Africa
aggressivität	aggressiveness
aktuell	current
alkohol	alcohol
allein	lonely/solely
alleine	alone
alleinsein	soleness
alles	everything
allgemein	general
alt	old
altersarmut	old-age poverty
altersversorgung	pension scheme
altersvorsorge	pension scheme
amerika	America
amerikanisierung	Americanization
and	different
anforder	demand
angebot	supply
angehör	loved ones
angehörigen	loved ones
angemess	appropriate
angst	fear
anhalt	anhalt
anpassung	adjustment
anspruch	claim
anspruchsdenken	entitlement mentality
anstand	decency
anstellung	employment
anstieg	increase
arb	work
arbeit	work
arbeiten	worked
arbeitgeber	employer
arbeitnehmer	employees
arbeits	wof the work
arbeitsamt	employment agency
arbeitslose	the workless
arbeitslosenquote	unemployment rate
arbeitslosenzahl	number of unemployed
arbeitslosenzahlen	jobless count
arbeitslosigkeit	unemployment
arbeitsmarkt	emplyment market
arbeitsmarktpolitik	labor market policy
arbeitsmarktsituation	employment situation
arbeitsmöglichkeiten	employment opportuinities
arbeitsplatz	job
arbeitsplätze	jobs
arbeitsplätzen	of the jobs
arbeitsplatzmangel	lack of jobs
arbeitssituation	job situation
arbeitsstelle	post
arm	poor
ärmer	poorer
armut	poverty
arroganz	arrogance
art	species
asylanten	asylum seekers
asylmissbrauch	asylum abuse
atomenergie	nuclear power
atomkraft	nuclear power
atomkraftwerke	atomic power plants
atompolitik	nuclear policy
aufträge	orders
auftret	perform
ausbeut	exploit
ausbildung	apprenticeship
ausbildungschancen	qualification chances
ausbildungsmöglichkeiten	training opportunities
ausbildungsplätze	apprenticeship places
ausbildungsplätzen	of the apprentice positions
ausbildungssituation	apprenticeship situation
ausbildungsstelle	apprenticeship place
ausbilungsplatz	apprenticeship place
ausbreit	expansion
auseinand	apart
auseinanderdriften	drifting apart
auseinanderklaffen	diverge
ausgab	expense
auskommen	subsistence
ausl	foreigners
auslagerung	outsourcing
ausland	foreign countries
ausländer	foreigners
ausländerfeindlichkeit	hostility to foreigners
ausnutz	exploitation
ausnutzung	exploitation
ausreichen	suffice
aussenpolit	foreign affairs
außenpolitik	foreign policy
aussicht	outlook
aussterben	cease
ausverkauf	sell-off
auswirkungen	consequences
autos	autos
bach	drain
bahn	track
bank	bank
banker	banker
bau	construction
bay	Bavaria
beamt	civil servants
bedroh	threat
beeinflussung	interference
beendig	finish
behalt	keep
behindert	disabled
behinderte	handicapped people
bekommen	receive
belastung	burden
belastungen	strains
benachteiligung	discrimination
benzin	gasoline
benzinpreis	gas price
benzinpreise	gasoline price
bereich	area
bereichen	areas
bereitet	to cause
bereitschaft	willingness
berlin	Berlin
beruf	profession
beruflich	occupational
beruflicher	occupational
berufs	professional
berufsausbildung	job training
berufsaussichten	job prospects
berufschancen	career opportunities
berufsleben	working life
berufswahl	occupational choice
bes	esp.
besser	better
bestechlichkeit	bribery
besteh	pass
bestraf	punish
bestraft	punished
beteiligung	involvement
betreu	care for
betrieb	business
betriebe	businesses
betrug	fraud
bevölker	population
bevölkerung	populace
bevormundung	patronization
bevorstehende	imminent
bezahlbar	affordable
bezahlt	paid
bezahlung	payment
beziehung	relation
bezug	earnings/benefits
bildung	education
bildungs	education
bildungschanc	educational chances
bildungsniveau	level of education
bildungsnotstand	educational crisis
bildungspolitik	educational policy
bildungssituation	educational situation
bildungsstand	educational attainment
bildungssystem	educational system
bildungswesen	education system
billig	cheap
bleiben	stay
bock	unmotivated
bosse	bosses
brauch	need
brd	FRG
breit	broad
brud	brother
brutalität	brutality
bse	bse
bundesländer	federal states
bundesländern	of the federal states
bundesregierung	Federal Government
bundesrepublik	federal republic
bundeswehr	Bundeswehr
bürger	citizens
bürokratie	bureaucracy
bürokratismus	red-tapeism
busch	Busch
bush	Bush
cdu	CDU
chancen	opportunities
christ	Christian
christlich	Christian
comput	computer
datenschutz	data protection
ddr	GDR
demografische	demographical
demographische	demographic
demographischen	demographic
demokratie	democracy
denken	think
denkt	thinks
derzeitige	current
desinteresse	disinterest
deutsch	German
deutschland	Germany
diäten	parliamentary allowance
dien	serve
ding	things
diskrepanz	discepancy
diskriminierung	discrimination
dringend	urgent
drogen	drugs
drogenkonsum	drug consumption
drogenmissbrauch	drug abuse
drohend	threatening
dtl	germ.
dumm	stupid
dummheit	stupidity
egoismus	egoism
ehe	marriage
ehefrau	wife
ehemal	former
ehemann	husband
ehepartner	spouse
ehrlich	honesty
eig	own
einfach	simple
einfluss	influence
einführ	introduction
einführung	introduction
einheit	unity
einkommen	income
einsam	lonely
einsatz	operation
einstellung	attitude
einwanderung	immigration
einzeln	of the individual
ellenbogengesellschaft	dog-eat-dog society
eltern	parents
energi	energy
energie	energy
energiekosten	energy costs
energiepolitik	energy policy
energiepreise	energy prices
energieversorgung	energy supply
enkel	grandchild
enkelkind	grandchild
enkelkinder	grandchildren
enkeln	grandchildren
enkels	grandchildren's
entfremd	alienation
entlohnung	remuneration
entscheiden	decision
entsolidarisierung	loss of solidarity
entsprech	appropriate
entw	devel.
entw	development
entwicklung	development
entwicklungsmöglichkeiten	development opportunities
erd	earth
erfolg	success
erhalt	conservation
erhöh	increase
erhöhung	rise
erkrankung	disease
ernahr	diet
erreich	reach
erwachs	adult
erwärmung	warming
erweiter	expand
erziehung	upbringing
etc	etc
ethik	ethics
ethisch	ethical
eu	EU
euro	euro
europa	Europe
euros	Euros
evtl	possibly
existenz	subsistence
fallen	fall
falsch	wrong
familiaere	familial
familiäre	familial
familie	family
familienangehörigen	relatives
familienleben	family life
familienmitglieder	family members
familienmitgliedern	family members
familienpolitik	family policy
fanatismus	fanaticism
fast	almost
fdp	FDP
fehl	miss
feindlichkeit	hostility
fernseh	television
fertig	finished
fest	permanent
film	film
finanz	finance
finanziell	financial
finanziell	financial
finanzierung	financing
finanzmärkte	financial markets
finden	find
firma	company
firmen	companies
folgen	follow
förderung	encouragement
forschung	research
fragebog	questionnaire
fragebögen	questionnaires
fragen	question
frau	woman/wife
frechheit	impertinence
frei	free
freiheit	freedom
freizeit	leisure time
fremd	foreign
fremdenhass	hatred of foreigners
freund	friend
freundin	girl friend
frieden	peace
führ	lead
führt	leads
gas	gas
gebiet	area
gebühren	charges
geburt	birth
geburtenrückgang	decline in birthrate
geeignet	suitable
geeignete	suitable
gefahr	danger
gefährd	threat
gefährd	threat
gefälle	incline
gefordert	supported
gefüge	fabric
gefühlskälte	emotional coldness
gefund	found
gegeb	given
gegenüber	against
gegenwart	present age
gehalt	wage
gehälter	salaries
geistig	mental
gekürzt	reduced
geld	money
geldentwertung	currency devaluation
geldgi	greed for money
gemeinschaft	community
generation	generation
generationen	generations
generell	general
gentechnik	GM technology
gentechnologie	GM technology
george	George
gerechtigkeit	justice
gericht	court
gering	low
gesamt	overall
geschaft	commerical
gesellschaft	society
gesetz	law
gesetzgeb	legislation
gesichert	secured
gesundheit	health
gesundheitliche	health
gesundheits	health-
gesundheitspolitik	healthcare policy
gesundheitsreform	health reform
gesundheitssystem	health care system
gesundheitswesen	health care system
gesundheitswesens	of the health care system
gesundheitszustand	state of health
getan	done
gewalt	violence
gewaltbereitschaft	readiness to use violence
gewerkschaften	unions
gewinn	profit
gier	greed
glaub	believe
glaubwuerdigkeit	credibility
glaubwurd	credibility
gleichgültigkeit	indifference
globale	global
globalisierung	globalisation
gottlosigkeit	godlessness
griff	control
gross	massive/majority
grösser	larger
grund	reason
grundgesetz	German constitution
grünen	Greens
gunst	favor
gut	good
halten	to keep
hand	hand
handeln	act
hart	severe
hartz	Hartz
hass	hate
haus	house
haushalt	household
heim	retirement home
hektik	rush
heutig	contemporary
hilf	help
hinsicht	regarding
hoffen	to hope
hoffent	hopefully
hohe	high
hund	dog
hungern	starve
ignoranz	ignorance
infaltion	inflation
inflation	inflation
inflationsrate	rate of inflation
inkompetenz	incompetence
innerhalb	within
insbesond	especially
insgesamt	altogether
integration	integration
integrieren	integrate
interess	interest
international	international
intoleranz	intolerance
irak	Iraq
irakkrieg	Iraq War
iran	Iran
irgendwann	anytime
islam	Islam
islamisierung	Islamification
islamismus	Islamism
islamisten	Islamists
israel	Israel
iv	iv
japan	Japan
jemal	ever
jetzig	current
job	jobs
jugend	youth
jugendarbeitslosigkeit	youth unemployment
jugendkriminalität	juvenile delinquency
jugentlichen	adolescents
jung	young
jüngeren	younger
justiz	judiciary
kalt	cold
kälte	coldness
kampf	battle
kapitalismus	capitalism
kapitals	capital
kaputt	kaputt
kass	chest
katastroph	catastrophe
kernkraftwerke	nuclear power plants
kinder	children
kinderarmut	child poverty
kinderbetreuung	child care
kindererziehung	child-rearing
kinderfeindlichkeit	hostility to children
kinderfreundlichkeit	fondness of children
kindergarten	kindergarten
kinderlos	childless
kinderschänder	child molester
kinderunfreundlichkeit	lack of accommodation for children
kinderwunsch	wish to have children
kindesmissbrauch	child abuse
kirch	church
klapp	work out
klass	class
klima	climate
klimaveränderung	climate change
klimawandel	climate change
kluft	gap
komm	come
konflikt	conflict
können	to be able to
kontrolle	control
konzerne	corporations
kopf	head
korruptheit	corruption
korruption	corruption
kosten	costs
krank	ill
krankenkasse	health insurance fund
krankenkassen	health insurance funds
krankheit	illness
kreb	cancer
krieg	war
kriegsgefahr	threat of war
kriminalität	criminality
kriminell	criminal
kriminellen	criminal
krimineller	criminal
kris	crisis
kultur	culture
kulturell	cultural
kultureller	cultural
kümmern	care
lage	state
land	land
länder	countries
landwirtschaft	agriculture
langsam	slow
lasch	lax
lasche	lax
lass	let
lasst	let
last	burden
lauf	run
lauft	runs
leben	live
lebenshaltungskosten	living expenses
lebensmittel	groceries
lebensstandard	living standard
lebensunterhalt	sustenance
lebt	lives
lehre	apprenticeship
lehrstelle	apprenticeship position
lehrstellenmangel	lack of apprenticeship openings
leichtsinn	carelessness
leid	sorrow
leistung	performance
leistungsbereitschaft	motivation to perform
leistungsdruck	pressure to achieve
lern	learn
letzt	last
leute	people
liebe	love
link	left
lobbyismus	lobbyism
lohn	wage
lohn	wage
lohndumping	wage dumping
löhne	wages
löhnen	wages
lösen	solve
lug	lie
lügen	lies
machen	do
mal	times
manager	manager
managern	of managers
manchmal	sometimes
mangel	lack of
mangelhaft	deficient
mangelnd	lacking
mangelnde	lacking
mangelnder	lack of
mann	man/husband
marktwirtschaft	market economy
massentierhaltung	factory farming
materialismus	materialism
materiell	material
medien	media
medizin	medicine
meist	most
menschen	people
menschheit	humanity
menschlich	human
mieten	rents
mild	mild
mio	mio.
missbrauch	abuse
mitburg	fellow citizens
miteinander	together
mitmenschen	fellows
mittelschicht	middle class
mittelstand	middle class
mittelstandes	of the middle class
mobbing	mobbing
möglich	possible
möglichkeiten	opportunities
momentane	current
monat	month
moral	moral
mord	murder
moslems	Moslems
multikulturell	multicultural
musst	must
mutter	mother
nach	after
nachfolg	following
nachkomm	descendants
nächsten	next
nah	close
nam	name
natur	nature
naturkatastrophen	natural disasters
negativ	negative
nehm	take
neid	envy
neonazis	neo-Nazis
netz	net
netzes	net
neu	new
nicht	not
nie	never
niedergang	demise
niedrig	low
nimmt	take
niveau	niveau
normen	norms
npd	NPD
oberflach	surface
oberflächlichkeit	superficiality
oberschicht	uppe class
obwohl	despite
öffentl	public
öffentlich	public
ohnmacht	powerlessness
okkultismus	occultism
ökosteuer	ecotax
opf	victim
ordentlich	tidy
orientierungslosigkeit	disorientation
ost	east
ostdeutschland	East Germany
partei	political party
partner	partner
partnerin	female partner
partnerschaft	partnership
passend	fitting
passieren	happen
person	person
persönl	pers.
persönliche	personal
perspektiven	perspectives
perspektivlosigkeit	lack of perspective
pflege	nursing
pflegebedürftigkeit	care dependency
pflegefall	invalid
pisa	PISA
platz	position
politik	politics
politikverdrossenheit	disenchantment with politics
polizei	police
prasident	president
präsident	president
preis	cost
preisanstieg	price increase
preisanstiege	price increases
preise	prices
preisentwicklung	price development
preiserhöhung	markup
preiserhöhungen	price hikles
preissteigerung	price increase
preissteigerungen	price increases
press	press
privat	privat
privatisierung	privatization
pro	pro
probl	problem
problem	problem
prüfung	exam
qualitat	quality
radikalismus	radicalism
raffgier	rapacity
realitätsferne	lack of contact with reality
rechtsextremismus	right-wing extremism
rechtsprechung	judicature
rechtsradikalismus	right-wing radicalism
rechtssprechung	judicature
rechtsstaat	state of law
rechtssystem	jurisdiction
reform	reform
reformstau	reform deadlock
reformunfähigkeit	inability to reform
regi	govern
regierung	government
region	region
reich	rich
reicht	suffice
reichtum	wealth
religioeser	religious
religion	religion
rente	pension
rentenalter	retirement age
rentenentwicklung	development of pension
rentenerhöhung	pension increase
rentenkürzung	pension cuts
rentenpolitik	pension policy
rentenreform	pension reform
rentensicherheit	pension security
rentenversicherung	pension insurance
rentner	pensioners
rentnern	pensioners
republ	republic
respekt	respect
respektlosigkeit	lack of respect
richt	judge
richtig	right
richtung	direction
rot	red
rückgang	decline
rucksichtslos	ruthless
rücksichtslos	ruthless
rücksichtslosigkeit	ruthelessness
runter	down
russen	Russians
russland	Russia
sachs	Saxony
sag	say
schaffe	accomplish
schaffung	creation
scheidung	divorce
schere	divide
schicht	class
schlecht	bad
schleichende	creeping
schlimm	sad/bad
schnell	fast
schröder	Schröder
schulabgänger	school-leaver
schulabschluss	school graduation
schulausbildung	school education
schulbildung	school education
schulden	debts
schule	school
schulpolitik	school policy
schulsituation	schooling situation
schulsystem	school system
schulwesen	school system
schutz	protection
schwach	weak
schwangerschaft	pregnancy
schwer	difficult
schwest	sister
schwiegereltern	parents-in-law
schwierig	difficult
sehen	to see
selbstand	self-employed
selbstbedienung	self-service
selbstbedienungsmentalität	self-service mentality
seuchen	epidemics
sicher	secure
sicherungssysteme	fallback system
single	single
sinkend	sinking
sitten	customs/conventions
sittlich	morally
situation	situation
skrupellosigkeit	unscrupulousness
sohn	son
söhne	sons
soldat	soldiers
solidarität	solidarity
sorgen	worries
sorglos	reckless
sorgt	cares
sozial	social
sozialabbau	cuts in social services
sozialleistungen	social benefits
sozialpolitik	social policy
sozialstaat	social state
sozialstaates	of the social state
sozialsysteme	social systems
sozialsystems	of the social syste
sozialsystems	of the social system
sozialversicherung	social insurance
spaltung	divission
spannung	tension
sparmaßnahmen	austerity measures
spassgesellschaft	fun-loving society
spat	late
spät	late
spd	SPD
spiel	game
sprach	language
spritpreise	gas price
staat	state
staatl	state
staatlich	by the state
staatsverschuldung	national debt
stabilität	stability
stadt	city
ständig	permanent
ständige	permanent
ständigen	continual
stark	strong
steh	stand
steigend	rising
steigenden	rising
steiger	increase
steigt	rises
stellen	jobs
sterb	die
stetig	continually
steuerbelastung	tax burden
steuererhoehung	tax hike
steuergelder	tax money
steuergeldern	of tax money
steuerlast	tax burden
steuern	taxes
steuerpolitik	tax policy
stoiber	Stoiber
straf	punishment
straftaten	crimes
straftäter	offender
straßen	road conditions
strom	electricity
struktur	structure
studi	study
studiengebühren	tuition fee
studienplatz	place at university
studium	studies
studiums	studies
suchen	search
sucht	searches
syst	system
system	system
systeme	systems
systems	of the system
tasch	pocket
teilweis	partly
terror	terror
terroranschläge	terrorist attacks
terrorismus	terrorism
teuer	expensive
teuerungsrate	rate of price increases
teuerungsraten	rate of price increases
teurer	more expensive
teuro	Teuro
theat	drama
tiere	animals
tierhaltung	animal farming
tierschutz	animal protection
tiertransporte	animal transports
tierversuche	animal testing
tochter	daughter
tod	death
toleranz	tolerance
trennung	separation
trotz	despite
turk	Turk
türkei	Turkey
türken	Turks
über	over
überall	everywhere
überalterung	superannuation of the population
überbevölkerung	overpopulation
überfremdung	foreign domination
übernahme	takeover
übernehm	absorb
überwach	surveil
überwachung	surveillance
übrig	remaining
umgang	contact
umgeh	circumvent
umschulung	retraining
umverteil	redistribution
umverteil	redistribution
umwelt	environment
umweltkatastrophen	ecological catatstrophes
umweltschutz	environment protection
unehrlichkeit	dishonesty
unfähige	incapable
unfähigkeit	inability
ungerecht	unjust
ungewiss	uncertain
ungewisse	uncertain
unglaubwuerdigkeit	incredibility
unglaubwürdigkeit	incredibility
ungleich	unequal
ungleichgewicht	imbalance
union	union
uns	us
unsichere	precarious
unsicherheit	insecurity
unt	below
untereinander	among each other
unternehm	enterprise
unterschiede	differences
unterstützung	support
unterwanderung	infiltration
unverstand	incomprehensible
unzufried	unsatisfied
unzuverlässigkeit	unreliability
urteil	verdict
usa	USA
vater	father
verander	change
verantwort	responsibility
verantwortungslosigkeit	irresponsibility
verarmung	impoverishment
verblödung	mental enfeeblement
verbrech	perpetrate
verbrecher	felons
verbrecher	felons
verbund	group
verdi	Verdi
verdienen	earn
verdummung	stultification
vereinsamung	isolation
verfall	decay
vergrösserung	enlargement
verhalten	behaviour
verhältnis	relation
verkauf	sale
verkehr	traffic
verlagerung	relocations
verli	lose
verliert	loses
verlogene	phoney
verlogenheit	factitiousness
verlor	lost
verlust	loss
vernicht	destroy
verrohung	coarsening
verschlechter	worsening
verschuld	indebtedness
verschwend	waste
versorgung	supply
verteilung	distribution
vertrauen	trust
verurteil	convicted
verwahrlosung	dilapidation
verwalt	administration
verwandt	related
viel	many/much
vogelgrippe	bird flu
volk	folk
volksverdummung	stupefaction of the people
volksvertreter	representative of the people
voll	full
vollig	utter
vorallem	especially
vorbild	role model
vorbildfunktion	role model function
vorhand	existing
wachsend	growing
wahl	election/choice
wahrheit	truth
wandel	transition
wass	water
weg	away
wegfall	omission
weiß	to know
weiterbildung	advanced training
weiterentwicklung	advancement
weitergehen	continue
welt	world
weltkrieg	world war
weltpolitik	global politics
weltweit	worldwide
weltweite	worldwide
werdegang	development
werdend	becoming
werte	values
werteverfall	decline in values
werteverlust	decline in values
wertverfall	fall in value
wertverlust	loss of value
west	west
wett	wetter
wirtsch	econom.
wirtschaft	economy
wirtschaftlich	economical
wirtschaftsbosse	economic bosses
wirtschaftspolitik	economic policy
wissenschaft	science
wohlergehen	wellbeing
wohnung	dwelling
zahlen	pay
zahlt	pays
zahlungsmoral	payment morale
zerfall	decay
zerstor	destruct
zieh	pull
zukunft	future
zukunftsangst	anxiety about the future
zukunftsaussichten	future prospects
zukunftschancen	future chances
zukunftsperspektiven	future outlook
zunahme	increase
zunehmend	increasing
zusammenhalt	cohesion
zusammenleben	coexistence
zustand	state of affairs
zuviel	too much/too many
zuviele	too many
zuwanderer	immigrants
zuwanderung	immigration
zuwenig	too little
zuzahlungen	additional payments
zweiklassengesellschaft	two-tier society
zwisch	between
zwischenmenschliche	interpersonal
